# Supplementary material for: Thermo-mechanical, morphological and water absorption properties of thermoplastic starch/cellulose composite foams reinforced with PLA
Source: Springer Nature journal article supplement (doi:10.1007/s10570-019-02393-1), 2019-03-28
Supplement: MOESM1 [file 16583094]

Thermo-mechanical, morphological and water absorption properties of thermoplastic starch/cellulose composite foams reinforced with PLA

Mohammad M. Hassan*, a,d, Marie J. Le Guen b,d, Nick Tucker c,d,[[1]](#footnote-1), Kate Parker b,d

a Food & Bio-based Products Group, AgResearch Limited, Private Bag 4749, Christchurch 8140, New Zealand.

b Scion, 49 Sala Street, Rotorua 3010, New Zealand.

c Plant & Food Research, Lincoln Agricultural Research Centre, Gerald Street, Lincoln, Canterbury 7608, New Zealand.

d Biopolymer Network (BPN), 49 Sala street, Rotorua 3010, New Zealand.

**Supplementary Material**


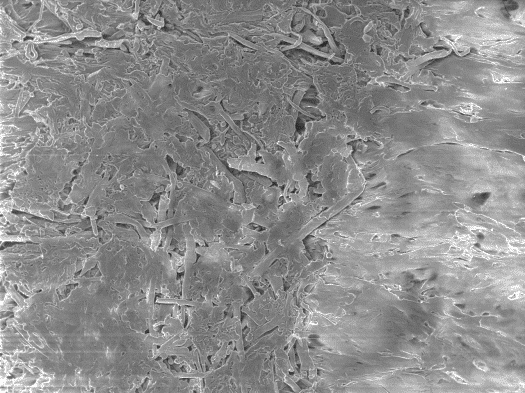

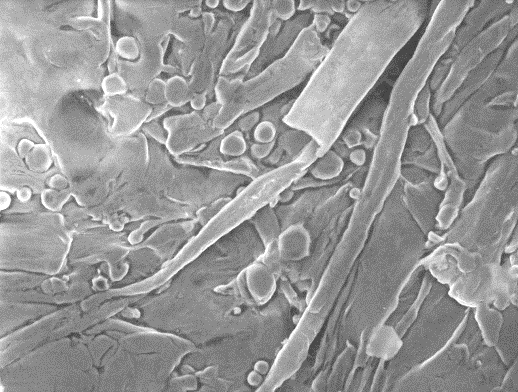
 Control starch/cellulose

**1000 μm**

**200 μm**


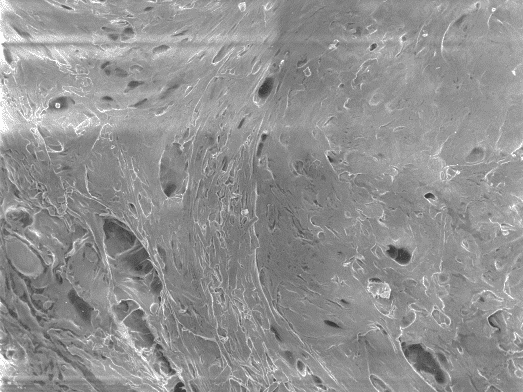

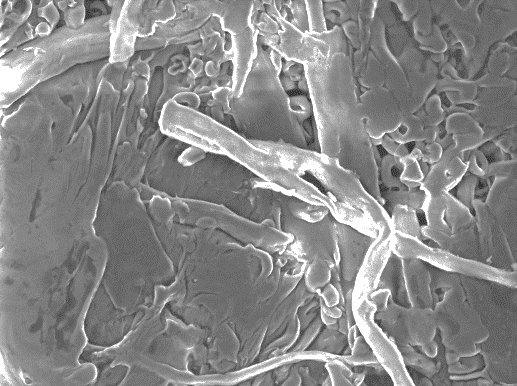
 2.45% PLA
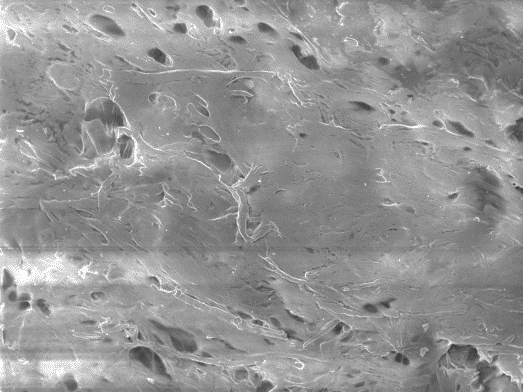

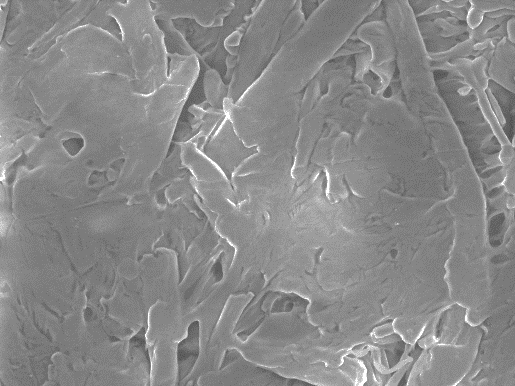
 4.86% PLA

**1000 μm**

**200 μm**

**1000 μm**

**200 μm**


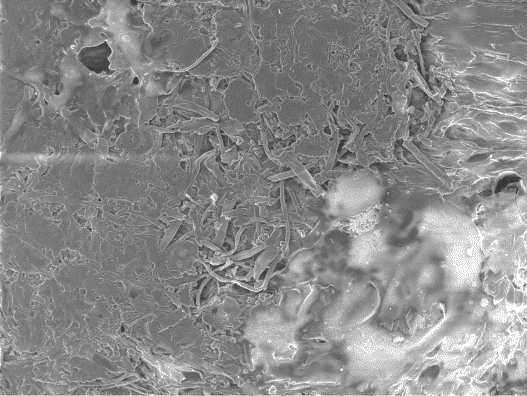

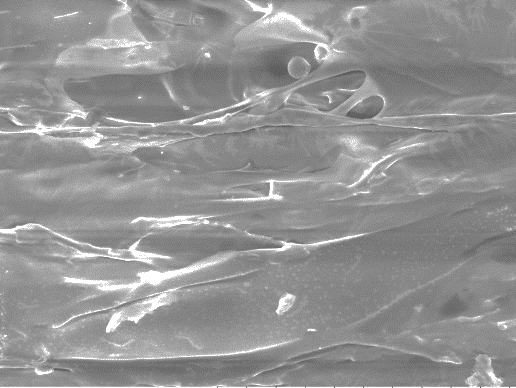
 7.28% PLA

**PLA layers**

**200 μm**

**1000 μm**


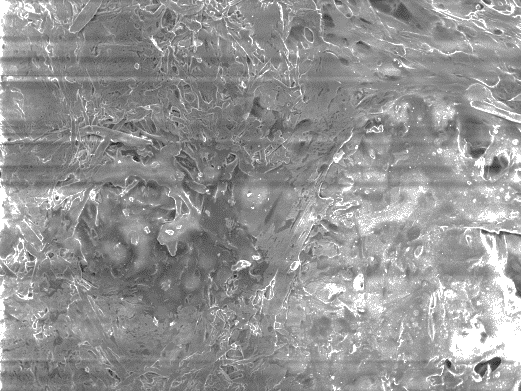

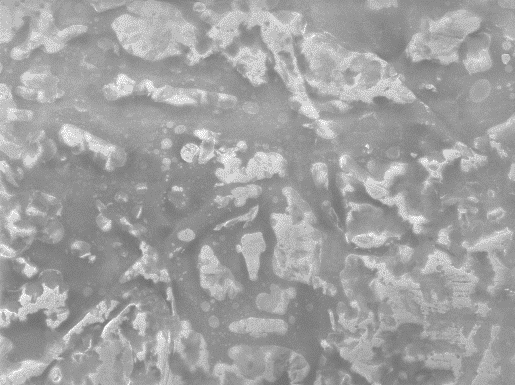
 9.72% PLA

**PLA layers**

**1000 μm**

**200 μm**

**Fig. S1** SEM micrographs of the surface of control starch/cellulose foam and also starch/cellulose foam containing 0, 2.45, 4.86, 7.28 and 9.72 % PLA.

**Fig. S2.** Water absorption properties of starch/cellulose composites and also starch cellulose composites with various weight (%) of PLA.

**Fig. S3.** ATR-FTIR spectra of control starch/cellulose and also starch/cellulose composites containing various weight (%) of PLA.

**Table S1** Dynamic contact angle of surface of starch/cellulose composites containing various eight (%) of PLA.

| PLA loading (%) | Average contact angle (°) at | | | |  |
| --- | --- | --- | --- | --- | --- |
| 0 s | 120 s | 240 s | 360 s | 480 s |
| 0 | 102.3±0.9 | 101.2±0.5 | 99.7±0.7 | 97.3±0.6 | 95.4±0.3 |
| 2.5 | 113.5±0.5 | 112.0±0.5 | 112.2±0.3 | 112.2±0.4 | 112.2±0.6 |
| 4.9 | 117.8±0.4 | 115.4±0.5 | 115.4±0.5 | 115.4±0.7 | 115.8±0.6 |
| 7.3 | 118.5±0.3 | 119.5±0.3 | 118.8±0.4 | 119.1±0.4 | 118.7±0.8 |
| 9.7 | 120.7±0.2 | 120.3±0.3 | 120.8±0.2 | 120.4±0.5 | 120.6±0.4 |

1. Present address: School of Engineering, University of Lincoln, Brayford Pool, Lincoln LN6 7TS, U.K. [↑](#footnote-ref-1)
